# Supplementary material for: Phosphorus Recovery by Adsorption from the Membrane Permeate of an Anaerobic Membrane Bioreactor Digesting Waste-Activated Sludge
Source: MDPI journal article supplement (doi:10.3390/membranes12010099), 2022-01-17
Supplement: s1 [file s1]

## Article

# Phosphorus Recovery by Adsorption from the Membrane Permeate of an Anaerobic Membrane Bioreactor Digesting Waste-Activated Sludge

Akira Hafuka and Katsuki Kimura \*

Division of Environmental Engineering, Graduate School of Engineering, Hokkaido University, North-13, West-8, Kita-ku, Sapporo 060-8628, Japan; ahafuka@eng.hokudai.ac.jp

\* Correspondence: kkatsu@eng.hokudai.ac.jp

## Supplementary material

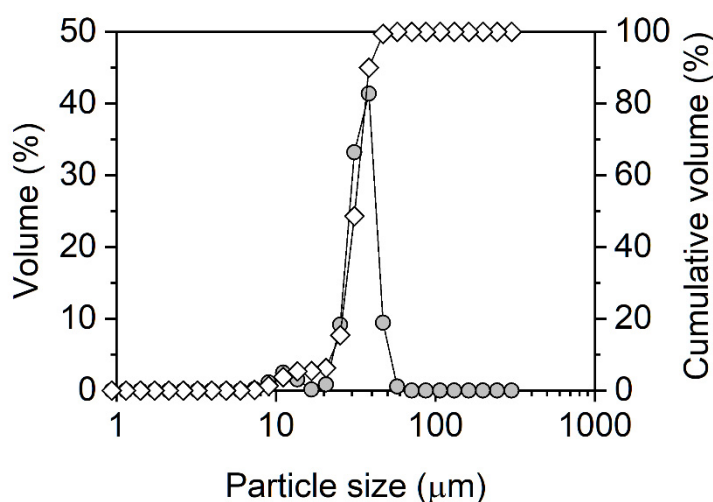

**Figure S1.** Particle size distribution of ZS.

**Citation:** Hafuka, A.; Kimura, K. Phosphorus Recovery by Adsorption from the Membrane Permeate of an Anaerobic Membrane Bioreactor Digesting Waste-Activated Sludge. *Membranes* **2022**, *12*, 99. <https://doi.org/10.3390/membranes12010099>

Academic Editor: Jia Wei Chew

Received: 10 December 2021

Accepted: 13 January 2022

Published: 17 January 2022

**Publisher's Note:** MDPI stays neutral with regard to jurisdictional claims in published maps and institutional affiliations.

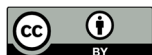

**Copyright:** © 2022 by the authors. Submitted for possible open access publication under the terms and conditions of the Creative Commons Attribution (CC BY) license (<https://creativecommons.org/licenses/by/4.0/>).
